# Supplementary material for: TGF-β1 affinity peptides incorporated within a chitosan sponge scaffold can significantly enhance cartilage regeneration
Source: Royal Society of Chemistry journal article supplement (doi:10.1039/c7tb02132a), 2018-01-01
Supplement: c7tb02132a1.pdf [file c7tb02132a1.pdf]

## Supporting Information

### TGF- $\beta$ 1 Affinity Peptides Incorporated within a Chitosan Sponge Scaffold Can Significantly Enhance Cartilage Regeneration

Jiaqing Chen, Yijiang Li, Bin Wang, Jiabei Yang, Boon Chin Heng, Zheng Yang,

Zigang Ge\*, Jianhao Lin\*

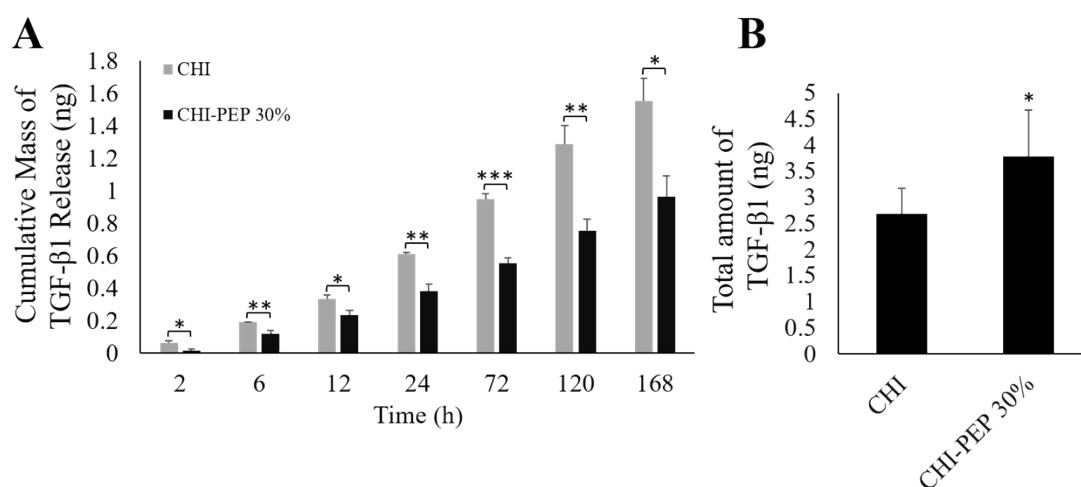

**Fig. S1** (A) The difference analysis by SPSS about TGF- $\beta$ 1 released from the CHI and CHI-PEP 30% at all time point in vitro. (B) The total amount of TGF- $\beta$ 1 in scaffold.

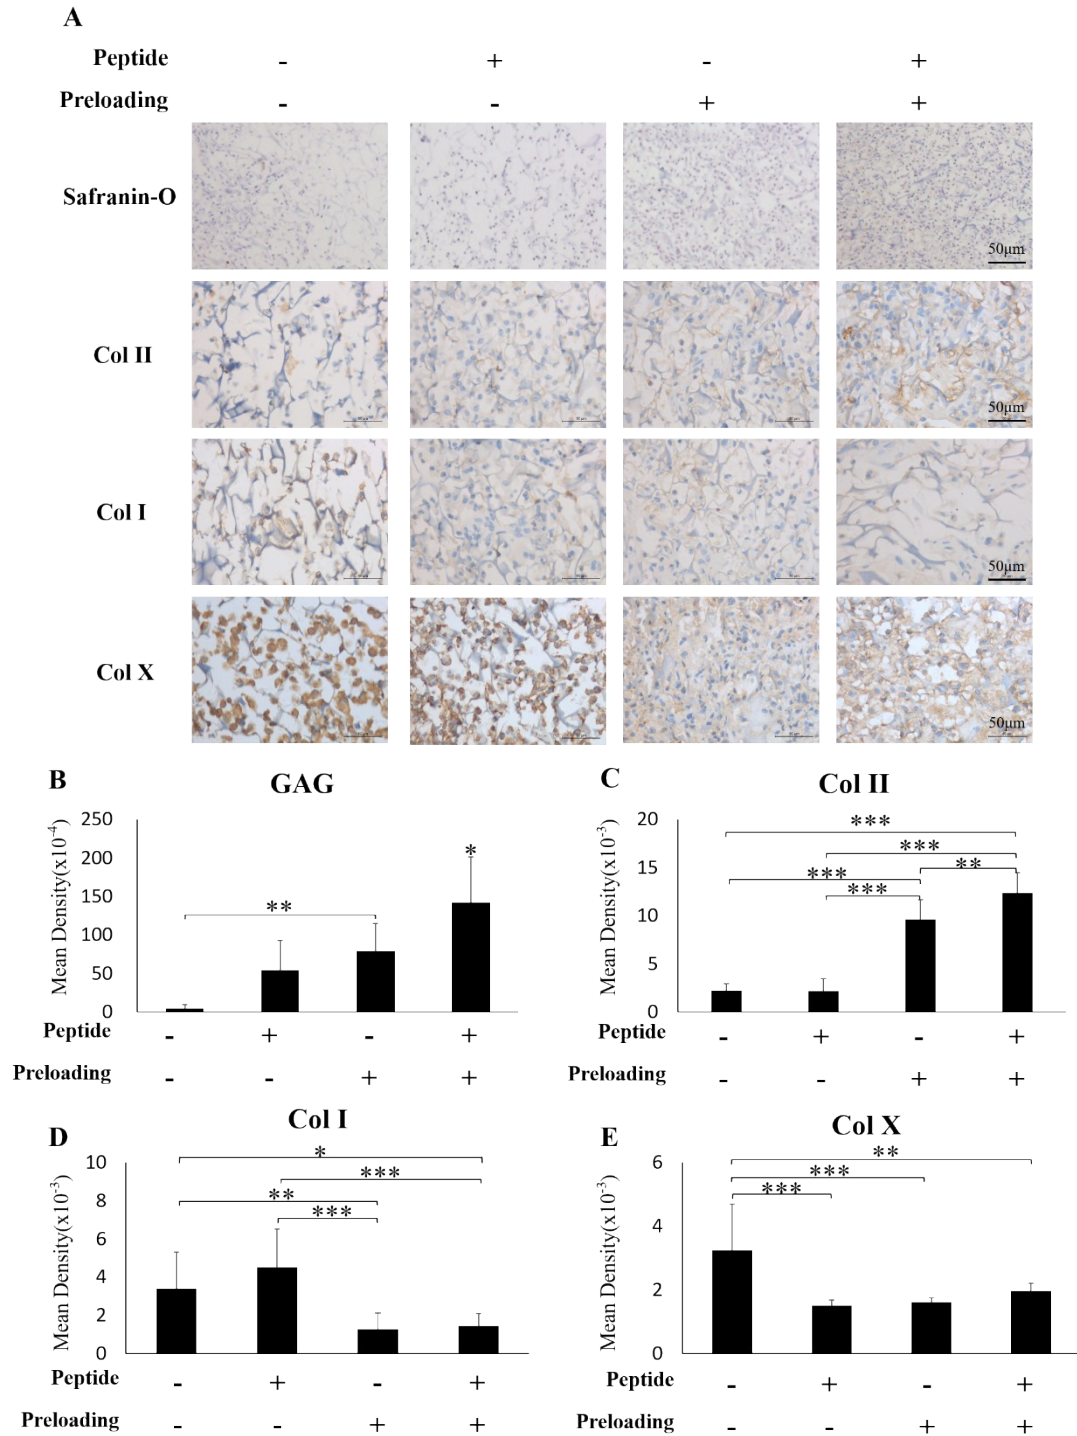

**Fig. S2** Implants in nude mice model at 4 weeks post-surgery with a seeding density of  $5 \times 10^5$  cells/sponge. (A) Results of safranin-O staining and immunohistochemical staining of collagen II, I and X at a seeding density of  $10^6$  cells/sponge. (B) GAG content in sponges. (C) Collagen II content in sponges. (D) Collagen I content in sponges. (E) Collagen X content in sponges ( $n=9$ , mean values  $\pm$  SD, \* $P < 0.05$ , \*\* $P < 0.01$ , \*\*\* $P < 0.001$ ). Scale bar represents  $50 \mu\text{m}$ .

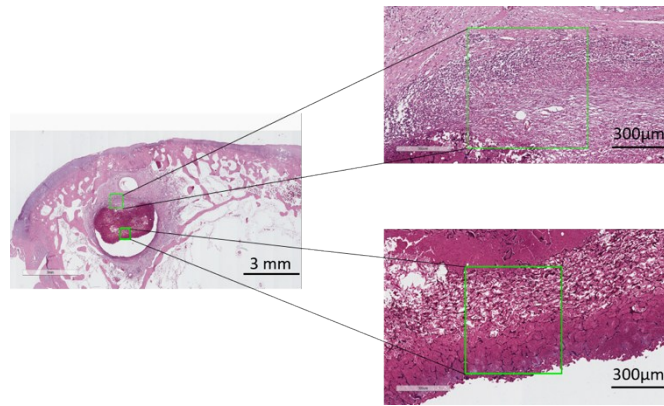

**Fig. S3** The connective fibrous tissues and minor inflammation in one of the CHI-PEP sponge scaffolds implanted in the rabbit after 6 months.

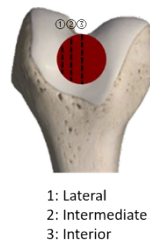

**Fig. S4** The illustration of different section of the defect from the lateral to Interior regions.

**Table S1** qRT-PCR primer sequences for chondrogenic marker genes

| Target | Primer sequence forward and reverse (5'-3')               |
|--------|-----------------------------------------------------------|
| GAPDH  | GTC ATC CAT GAC AAC TTC GG<br>GCC ACA GTT TCC CAG AGG     |
| COL I  | CAG AAC GGC CTC AGG TAC CA<br>CAG ATC ACG TCA TCG CAC AAC |
| COL II | GAG AGG TCT TCC TGG CAA AG<br>AAG TCC CTG GAA GCC AGAT    |
| COL X  | CAG GTA CCA GAG GTC CCA TC<br>CAT TGA GGC CCT TAG TTG CT  |
| AGG    | CGA AAC ATC ACC GAG GGT<br>GCA AAT GTA AAG GGC TCC TC     |

Sox9

ATC AGT ACC CGC ACC TGC AC

CTT GTA ATC CGG GTG GTC CTT

**Table S2** ICRS macroscopic evaluation of cartilage repair

| Cartilage repair assessment ICRS                                                     | Score |
|--------------------------------------------------------------------------------------|-------|
| <b>I. Degree of defect repair</b>                                                    |       |
| In level with surrounding cartilage                                                  | 4     |
| 75% repair of defect depth                                                           | 3     |
| 50% repair of defect depth                                                           | 2     |
| 25% repair of defect depth                                                           | 1     |
| 0% repair of defect depth                                                            | 0     |
| <b>II. Integration to border zone</b>                                                |       |
| Complete integration with surrounding cartilage                                      | 4     |
| Demarcating border < 1 mm                                                            | 3     |
| 3/4th of graft integrated, 1/4th with a notable border > 1 mm width                  | 2     |
| 1/2 of graft integrated with surrounding cartilage, 1/2 with a notable border > 1 mm | 1     |
| From no contact to 1/4th of graft integrated with surrounding cartilage              | 0     |
| <b>III. Macroscopic appearance</b>                                                   |       |
| Intact smooth surface                                                                | 4     |
| Fibrillated surface                                                                  | 3     |
| Small, scattered fissures or cracs                                                   | 2     |

|                                          |      |
|------------------------------------------|------|
| Several, small or few but large fissures | 1    |
| Total degeneration of grafted area       | 0    |
| <b>Overall repair assessment</b>         |      |
| Grade I: normal                          | 12   |
| Grade II: nearly normal                  | 11–8 |
| Grade III: abnormal                      | 7–4  |
| Grade IV: severely abnormal              | 3–1  |

**Table S3** ICRS Visual Histological Assessment Scale

| Feature                         | Score |
|---------------------------------|-------|
| <b>I. Surface</b>               |       |
| Smooth/continuous               | 3     |
| Discontinuities/irregularities  | 0     |
| <b>II. Matrix</b>               |       |
| Hyaline                         | 3     |
| Mixture: hyaline/fibrocartilage | 2     |
| Fibrocartilage                  | 1     |
| Fibrous tissue                  | 0     |
| <b>III. Cell distribution</b>   |       |
| Columnar                        | 3     |
| Mixed/columnar-clusters         | 2     |
| Clusters                        | 1     |

|                                                    |   |
|----------------------------------------------------|---|
| Individual cells/disorganized                      | 0 |
| IV. Cell population viability                      |   |
| Predominantly viable                               | 3 |
| Partially viable                                   | 1 |
| <10% viable                                        | 0 |
| V. Subchondral Bone                                |   |
| Normal                                             | 3 |
| Increased remodeling                               | 2 |
| Bone necrosis/granulation tissue                   | 1 |
| Detached/fracture/callus at base                   | 0 |
| VI. Cartilage mineralization (calcified cartilage) |   |
| Normal                                             | 3 |
| Abnormal/inappropriate location                    | 0 |

---
